# Supplementary material
Source: PubMed Central journal article supplement (PMC11073164)

## **Supplemental Data**

### **Cathepsin S Activity Controls Chronic Stress-Induced Muscle Atrophy and Dysfunction in Mice**

**\*Corresponding author:** Prof. Xian Wu Cheng, Department of Cardiology and Hypertension, Jilin Provincial Key Laboratory of Stress and Cardiovascular Disease, Yanbian University Hospital, 1327 Juzijie, Yanji 133000, China. Email: [chengxw0908@163.com](mailto:chengxw0908@163.com); [xianwu@med.nagoya-u.ac.jp](mailto:xianwu@med.nagoya-u.ac.jp)

## Supplementary Figure Legends

**Suppl. Fig. S1.** Chronic stress worsened the laminin expression and the desmin expression in gastrocnemius (GAS) muscle of control and stressed CTSS<sup>+/+</sup> mice at 14 days. **a,c:** Representative immunofluorescence images and quantitative data for the intensity of desmin protein expression in GAS muscles of the two experimental groups at Day 14 after stress (n=5). Scale bar: 75  $\mu$ m. **b,d:** A representative TUNEL staining image used to assess the content of apoptotic cells and quantitative data for TUNEL-positive cells (n=6). *Yellow arrows:* TUNEL<sup>+</sup> cells. **e:** Stress produced a harmful change in targeted mitochondrial biogenesis, oxidative stress-, and inflammation-related gene expression in the GAS muscle of CTSS wildtype (CTSS<sup>+/+</sup>) mice at day 0, 7, and 14 after stress. The data are mean  $\pm$  SEM, and p-values were determined by one-way ANOVA followed by Tukey's post hoc tests (e) or unpaired Student's t-test (c,d). Control: non-stressed CTSS<sup>+/+</sup> mice, Stress: 14-day-stressed CTSS<sup>+/+</sup> mice. \* $p$ <0.05; \*\* $p$ <0.01; N.S, not significant

**Suppl. Fig. S2.** CTSS deficiency (CTSS<sup>-/-</sup>) mitigated the investigated gene expressions in the GAS muscles of four experimental groups at day 0, 7, and 14 after stress. **a-d:** Quantitative polymerase chain reaction (qPCR) data showing the levels of CTSK, CTSL, cystatin C, GLUT-4, PGC-1 $\alpha$ , PPAR- $\gamma$ , gp91<sup>phox</sup>, p47<sup>phox</sup>, TNF- $\alpha$ , ICAM-1, MCP-1, TLR-4 and MyD88 mRNAs. The data are mean  $\pm$  SEM, and p-values were determined by one-way ANOVA followed by Tukey's post hoc tests. \* $p$ <0.05; \*\* $p$ <0.01; N.S, not significant. CW: CTSS<sup>+/+</sup> control mice, CK: CTSS<sup>-/-</sup> control mice, SW: 14-day-stressed CTSS<sup>+/+</sup> mice, SK: 14-day-stressed CTSS<sup>-/-</sup> mice.

**Suppl. Fig. S3.** The cathepsin S inhibitor (CTSS-I) alleviated stress-related muscle fiber microstructure repair and apoptosis in mice. **a,b:** Representative immunofluorescence images and quantitative data for the intensity of desmin protein expression in VS and IS groups (n=5 each) at Day 14 after stress. Scale bar: 75  $\mu$ m. **c:** Representative TUNEL staining used to assess the content of apoptotic cells. **d:** Quantitative data for TUNEL-positive cells in VS and IS mice (n=6). *Yellow arrows:* TUNEL<sup>+</sup> cells. **e:** Representative immunoblotting images and quantitative data for Desmin and GAPDH protein in the lysates of the GAS muscles of four experimental groups at day 14 after stress (n=3). **f:** CTSS inhibition exerted a beneficial effect on the levels of CTSK, CTSL, cystatin C, GLUT-4, PGC-1 $\alpha$ , PPAR- $\gamma$ , gp91<sup>phox</sup>, p47<sup>phox</sup>, ICAM-1, TLR-4 and MyD88 genes of the GAS muscles of two stressed experimental groups at day 14 after stress. The data are mean  $\pm$  SEM, and p-values were determined by unpaired Student's t-test (b, d, f) or one-way ANOVA followed by Tukey's post hoc

tests (e). \* $p < 0.05$ ; \*\* $p < 0.01$ ; N.S, not significant. VC: CTSS<sup>+/+</sup> mice loaded vehicle; IC: CTSS<sup>+/+</sup> mice loaded CTSS-I; VS: CTSS<sup>+/+</sup> mice loaded vehicle+stress; IS: CTSS<sup>+/+</sup> mice loaded CTSS-I+stress. ig: intragastric administration

**Suppl. Fig. S4.** CTSS-I ameliorated the investigated molecule alterations in stressed skeletal muscles of four experimental group mice. **a-d**: Representative immunoblotting images and quantitative data for IRS-2, p-PI3K, p-Akt, p-mTOR, p-FoxO1 $\alpha$ , MuRF-1, MAFbx1, PGC-1 $\alpha$ , PPAR- $\gamma$ , C-caspase-3, Bcl-2 in GAS muscles at Day 14 after stress (n=3). The data are mean  $\pm$  SEM, and p-values were determined by one-way ANOVA followed by Tukey's post hoc tests (b-d). VC: CTSS<sup>+/+</sup> loaded vehicle+non-stress, IC: CTSS<sup>+/+</sup> loaded CTSS-I+non-stress, VS: CTSS<sup>+/+</sup> loaded vehicle+stress, IS: CTSS<sup>+/+</sup> loaded CTSS-I+stress. \* $p < 0.05$ ; \*\* $p < 0.01$ ; N.S, not significant

**Suppl. Fig. S5.** Effect of H<sub>2</sub>O<sub>2</sub> on C<sub>2</sub>C<sub>12</sub> cell apoptosis. For the evaluation of oxidative stress-induced cell apoptosis, the C<sub>2</sub>C<sub>12</sub> cells were cultured with 0 and 400  $\mu$ M H<sub>2</sub>O<sub>2</sub> for 24 hr, and then were subjected to TUNEL staining. **a,b**: Representative image of TUNEL immunofluorescence and combined quantitative data show the numbers of TUNEL<sup>+</sup> apoptotic cells treated with 0 and 400  $\mu$ M H<sub>2</sub>O<sub>2</sub> (n=5 each). *Yellow arrows*: TUNEL<sup>+</sup> cells. **c-d**: Representative immunoblotting images and quantitative data for CTSS, IRS-2, p-Akt, p-FoxO1 $\alpha$ , MuRF-1, C-caspase-3, and Bcl-2 in the lysates of three groups of C<sub>2</sub>C<sub>12</sub> cells (n=3 each). **e**: qPCR analysis of CTSS, CTSK, CTSL and cystatin C gene expressions in C<sub>2</sub>C<sub>12</sub> cells in response to H<sub>2</sub>O<sub>2</sub> (n=7, each group). The data are mean  $\pm$  SEM, and p-values were determined by unpaired Student's t-test (b,d-e) . \* $p < 0.05$ ; \*\* $p < 0.01$ ; N.S, not significant

**Suppl. Fig. S6.** CTSS silencing mitigated H<sub>2</sub>O<sub>2</sub>-induced C<sub>2</sub>C<sub>12</sub> cell apoptosis. C<sub>2</sub>C<sub>12</sub> cells were treated with the non-targeting control RNA and siCTSS for 24 hr and then subjected to the western blotting. **a**: Representative immunoblotting images and quantitative data for the CTSS protein levels of the lysates (n=3 each). Following transfection with non-targeting control RNA and siCTSS for 48 hr, the cells were cultured in serum-free medium containing H<sub>2</sub>O<sub>2</sub> at the indicated concentrations for 24 hr. The cells were then subjected to qPCR, apoptosis, and western blotting assays. **b**: qPCR data showing the CTSS expression in the three groups. **c**: *Left panel*: The myotubes with siCTSS or non-targeting control and dose cells treated with H<sub>2</sub>O<sub>2</sub> 0  $\mu$ M or H<sub>2</sub>O<sub>2</sub> 400  $\mu$ M were subjected to immunofluorescence staining for MHC. *Right panel*: Quantification of the mean myotube diameters. **d**: Representative images of TUNEL immunofluorescence and combined quantitative data showing the numbers of TUNEL<sup>+</sup>

apoptotic cells in four experimental groups: Cont-H<sub>2</sub>O<sub>2</sub>-0 μM, si-H<sub>2</sub>O<sub>2</sub>-0 μM, Cont-H<sub>2</sub>O<sub>2</sub>-400 μM, and si-H<sub>2</sub>O<sub>2</sub>-400 μM (n=5 each). *Yellow arrows*: TUNEL<sup>+</sup> cells. Scale bar: 200 μm. **e-f**: Representative immunoblotting images and quantitative data for CTSS, IRS-2, p-Akt, p-FoxO1α, MuRF-1, C-caspase-3, and Bcl-2 in whole-cell lysates of four groups of C<sub>2</sub>C<sub>12</sub> cells (n=3). The data are mean ± SEM, and p-values were determined by one-way ANOVA followed by Tukey's post hoc tests (b,c,f) or unpaired Student's t-test (a,d). \**p*<0.05; \*\**p*<0.01; N.S, not significant

**Suppl. Fig. S7.** CTSS overexpression enhanced H<sub>2</sub>O<sub>2</sub>-induced C<sub>2</sub>C<sub>12</sub> cell apoptosis. C<sub>2</sub>C<sub>12</sub> cells were treated with control empty plasma and pl-CTSS for 24 hr and then subjected to a western blotting assay. **a**: Representative immunoblotting images and quantitative data for the CTSS protein levels of two experimental groups (n=3 each). Following transfection with control empty plasma and pl-CTSS for 48 hr, the cells were cultured in serum-free medium containing H<sub>2</sub>O<sub>2</sub> at the indicated concentrations for 24 hr and then subjected to qPCR, apoptosis, and western blotting assays. **b**: qPCR data showing the CTSS expression in three groups. **c**: Representative images show green fluorescent protein (GFP)-labeled CTSS plasmid<sup>+</sup> C<sub>2</sub>C<sub>12</sub> cells after transfection, at 0 hr and 16 hr. Scale bar: 500 μm. **d**: *Upper panel*: The myotubes with pl-CTSS or control empty plasma and dose cells were treated with H<sub>2</sub>O<sub>2</sub> 0 μM or H<sub>2</sub>O<sub>2</sub> 400 μM and then subjected to immunofluorescence staining for MHC. *Lower panel*: Quantification of the mean myotube diameters of four experimental groups: Cont-H<sub>2</sub>O<sub>2</sub>-0 μM, pl-H<sub>2</sub>O<sub>2</sub>-0 μM, Cont-H<sub>2</sub>O<sub>2</sub>-400 μM, and pl-H<sub>2</sub>O<sub>2</sub>-400 μM (n=5 each). **e**: Representative images of TUNEL immunofluorescence and combined quantitative data showing the numbers of TUNEL<sup>+</sup> apoptotic cells in the four experimental groups: Cont-H<sub>2</sub>O<sub>2</sub>-0 μM, pl-H<sub>2</sub>O<sub>2</sub>-0 μM, Cont-H<sub>2</sub>O<sub>2</sub>-400 μM, and pl-H<sub>2</sub>O<sub>2</sub>-400 μM (n=5 each). *Yellow arrows*: TUNEL<sup>+</sup> cells Scale bar: 200 μm. **f**: Representative immunoblotting images and quantitative data for CTSS, IRS-2, p-Akt, p-FoxO1α, MuRF-1, C-caspase-3, and Bcl-2 in whole-cell lysates of four groups of C<sub>2</sub>C<sub>12</sub> cells (n=3 each). The data are mean ± SEM, and p-values were determined by one-way ANOVA followed by Tukey's post hoc tests (b,d,f) or unpaired Student's t-test (a,e). \**p*<0.05; \*\**p*<0.01; N.S, not significant

**Suppl. Fig. S8** The mechanism underlying CTSS-mediated IRS-2 signaling inactivation in stress-induced skeletal muscle wasting and dysfunction. Abbreviation: Bcl-2, apoptosis-related B-cell lymphoma 2; IRS-2, insulin receptor substrate 2; MAFbx1, muscle RING-finger protein-1 protein; MuRF-1, forkhead box-1; p-Akt, phospho-protein kinase B; p-mTOR, phospho-mammalian target of rapamycin; p-PI3K, phospho-phosphatidylinositol 3-kinase; PPAR-α; peroxisome proliferator-activated

receptor- $\gamma$  coactivator- $\alpha$ .

**Table S1.** The information of experiment groups

| a. For time course                                                          |                          |                          |                             |    |
|-----------------------------------------------------------------------------|--------------------------|--------------------------|-----------------------------|----|
| Group name                                                                  |                          | CTSS types               | Stress days                 | n= |
| Non-stress                                                                  |                          | CTSS <sup>+/+</sup> mice | 0                           | 7  |
| Stress-7days                                                                |                          | CTSS <sup>+/+</sup> mice | 7                           | 7  |
| Stress-14days                                                               |                          | CTSS <sup>+/+</sup> mice | 14                          | 7  |
| b. For CTSS deficiency function detection                                   |                          |                          |                             |    |
| Group name                                                                  |                          | Mice types               | Stress days                 | n= |
| CW                                                                          |                          | CTSS <sup>+/+</sup> mice | 0                           | 8  |
| CK                                                                          |                          | CTSS <sup>-/-</sup> mice | 0                           | 8  |
| SW                                                                          |                          | CTSS <sup>+/+</sup> mice | 14                          | 8  |
| SK                                                                          |                          | CTSS <sup>-/-</sup> mice | 14                          | 8  |
| c. For Pharmacological CTSS inhibition function ( CTSS <sup>+/+</sup> mice) |                          |                          |                             |    |
| Group name                                                                  | CTSS                     | Stress days              | Intragastric administration | n= |
| VC                                                                          | CTSS <sup>+/+</sup> mice | 0                        | vehicle                     | 8  |
| IC                                                                          | CTSS <sup>+/+</sup> mice | 0                        | CTSS inhibitor              | 8  |
| VS                                                                          | CTSS <sup>+/+</sup> mice | 14                       | vehicle                     | 8  |
| IS                                                                          | CTSS <sup>+/+</sup> mice | 14                       | CTSS inhibitor              | 8  |

**Table S2:** Primer sequences for mice used for quantitative real-time PCR

| Genes                | Forward Primers          | Reverse Primers           |
|----------------------|--------------------------|---------------------------|
| CTSS                 | GTGGCCACTA AAGGGCCTG     | ACCGCTTTTGTAGAAGAAGAAGGAG |
| CTSK                 | AGCAGGCTGGAGGACTAAGGT    | TTTGTGCATCTCAGTGGAAGACT   |
| CTSL                 | ACAGAAGACTGTATGGCACGA    | GTATCCCCGTTGTGTAGCTG      |
| cystatin C           | TGAGCGAGTACAACAAGGGC     | GGCTGGTCATGGAAAGGACAG     |
| gp91 <sup>phox</sup> | ACTTTCCATAAGATGGTAGCTTGG | GCATTCACACACCACTCAACG     |
| p47 <sup>phox</sup>  | AACTACCTGGAGCCAGTTGAG    | AATTAGGAGGTGGTGGAATATCGG  |
| GLUT-4               | ACACTGGTCCTAGCTGTATTCT   | CCAGCCACGTTGCATTGTA       |
| PGC1 $\alpha$        | AGACGGATTGCCCTCATTGA     | GGTCTTAACAATGGCAGGGTTT    |
| PPAR- $\gamma$       | GGAAGACCACTCGCATTCTT     | GTAATCAGCAACCATTGGGTCA    |
| TNF- $\alpha$        | CAGGCGGTGCCTATGTCTC      | CGATCACCCCGAAGTTCAGTAG    |
| ICAM-1               | CCCCGCAGGTCCAATTC        | CCAGAGCGGCAGAGCAA         |
| MCP-1                | GCCCCACTCACCTGCTGCTACT   | CCTGCTGCTGGTGATCCTCTTGT   |
| TLR-4                | AGTGGGTCAAGGAACAGAAGCA   | CTTACCAGCTCATTCTCACC      |
| MyD88                | TCATGTTCTCCATACCCTTGGT   | AAACTGCGAGTGGGGTCAG       |
| GAPDH                | ATGTGTCCGTCGTGGATCTGA    | ATGCCTGCTTACCACCTTCT      |

**Abbreviations:** CTSS (cathepsin S); CTSK (cathepsin K); CTSL (cathepsin L); cystatin C; gp91<sup>phox</sup>; p47<sup>phox</sup>; GLUT-4 (Glucose Transporter 4); PGC1 $\alpha$  (peroxisome proliferator-activated receptor co-activator-1 $\alpha$ ); PPAR- $\gamma$  (peroxisome proliferator-activated receptor- $\gamma$ ); TNF- $\alpha$  (tumor necrosis factor- $\alpha$ ); ICAM-1 (Vascular cell adhesion molecule-1); MCP-1 (monocyte chemoattractant protein-1); TLR-4 (toll-like receptor-4); MyD88 (myeloid differentiation primary response 88), GAPDH (Glyceraldehyde-3-phosphate dehydrogenase)

**Fig S1**

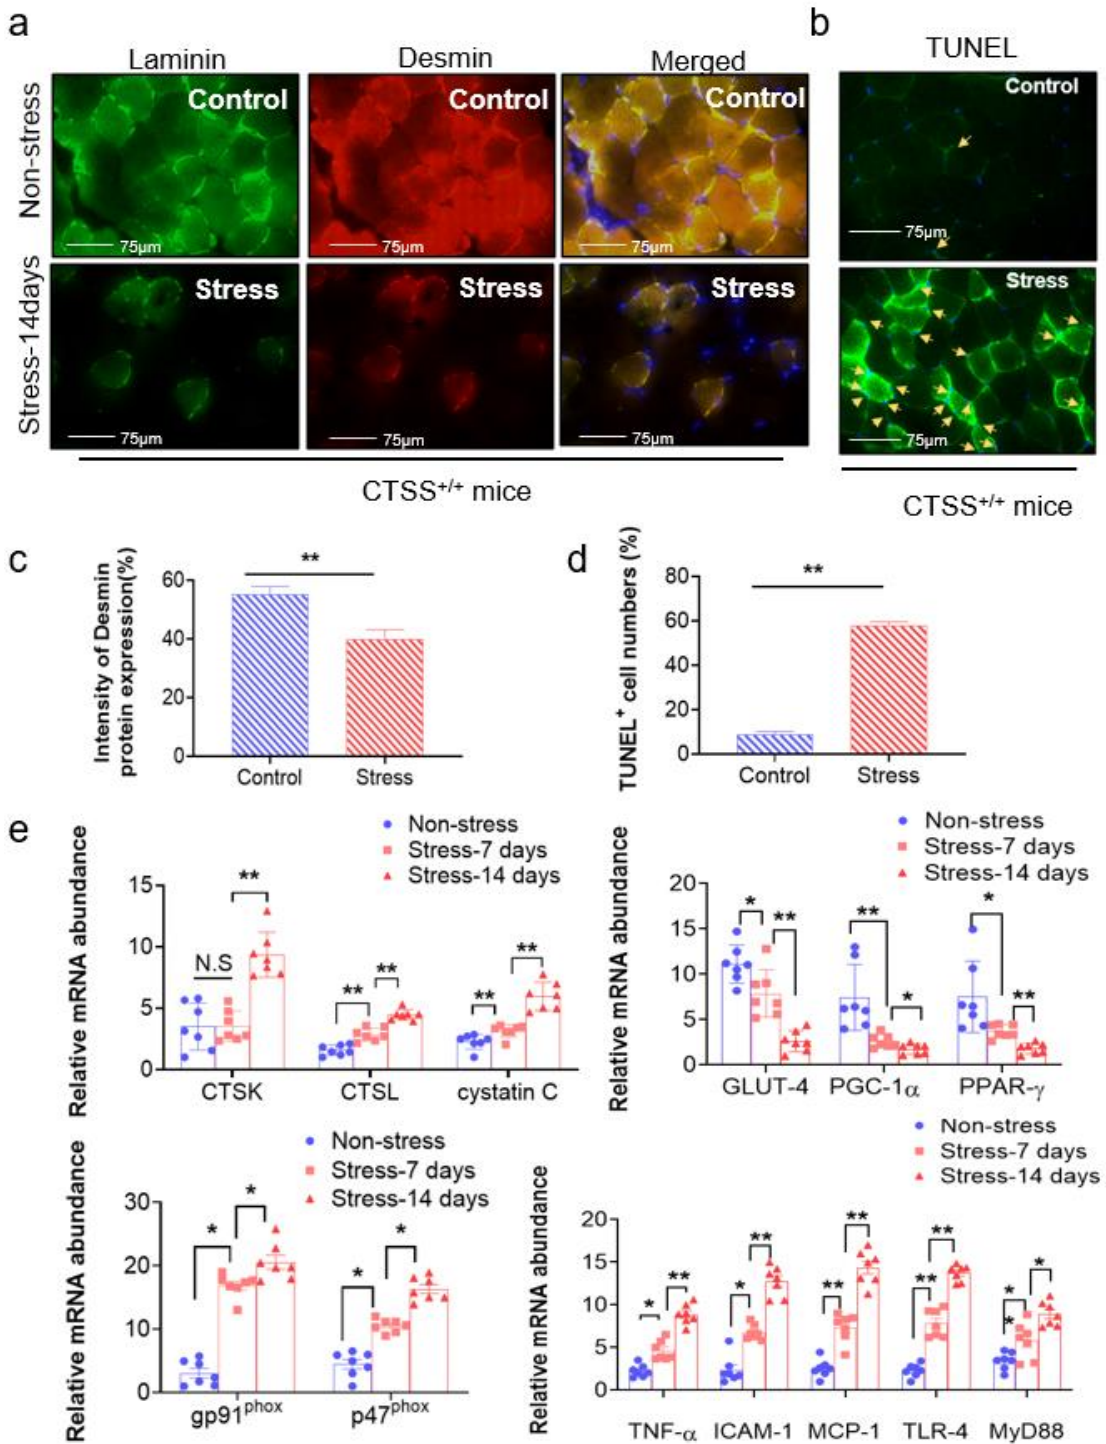



**Fig S2**

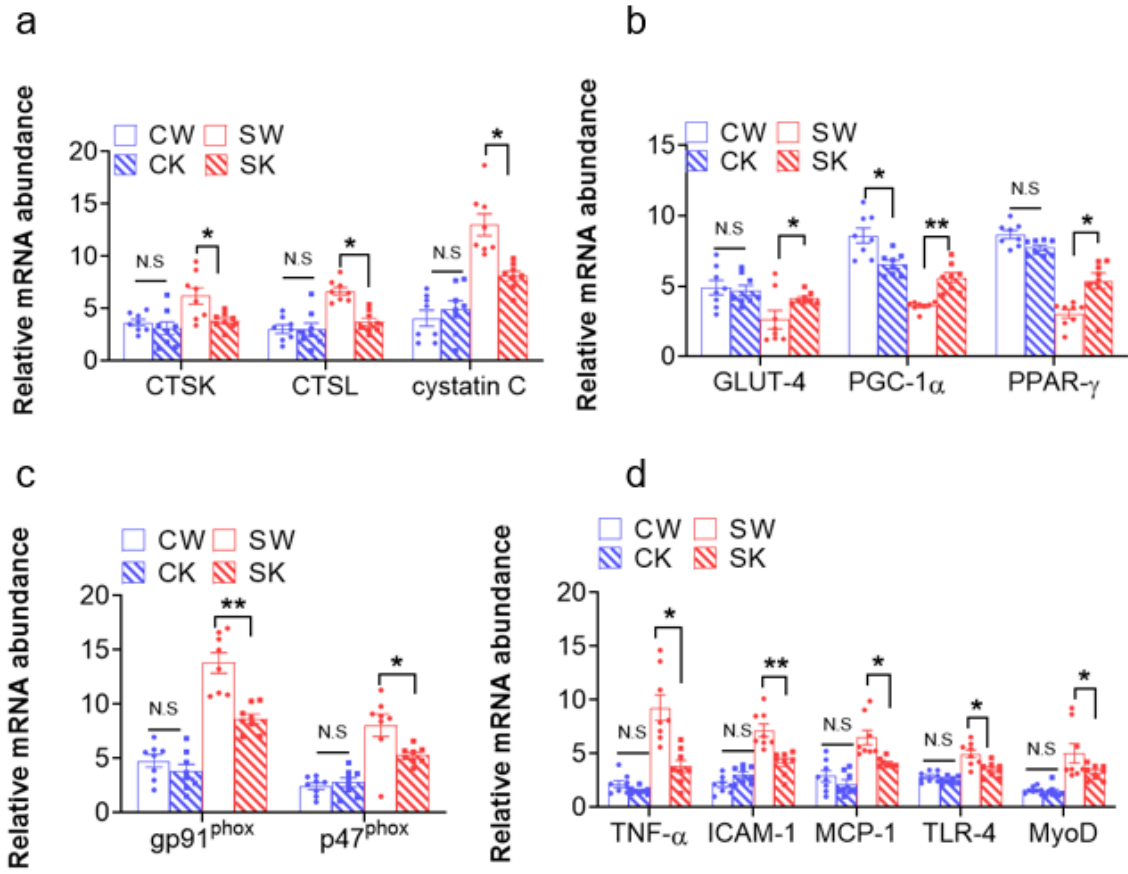

**Fig S3**

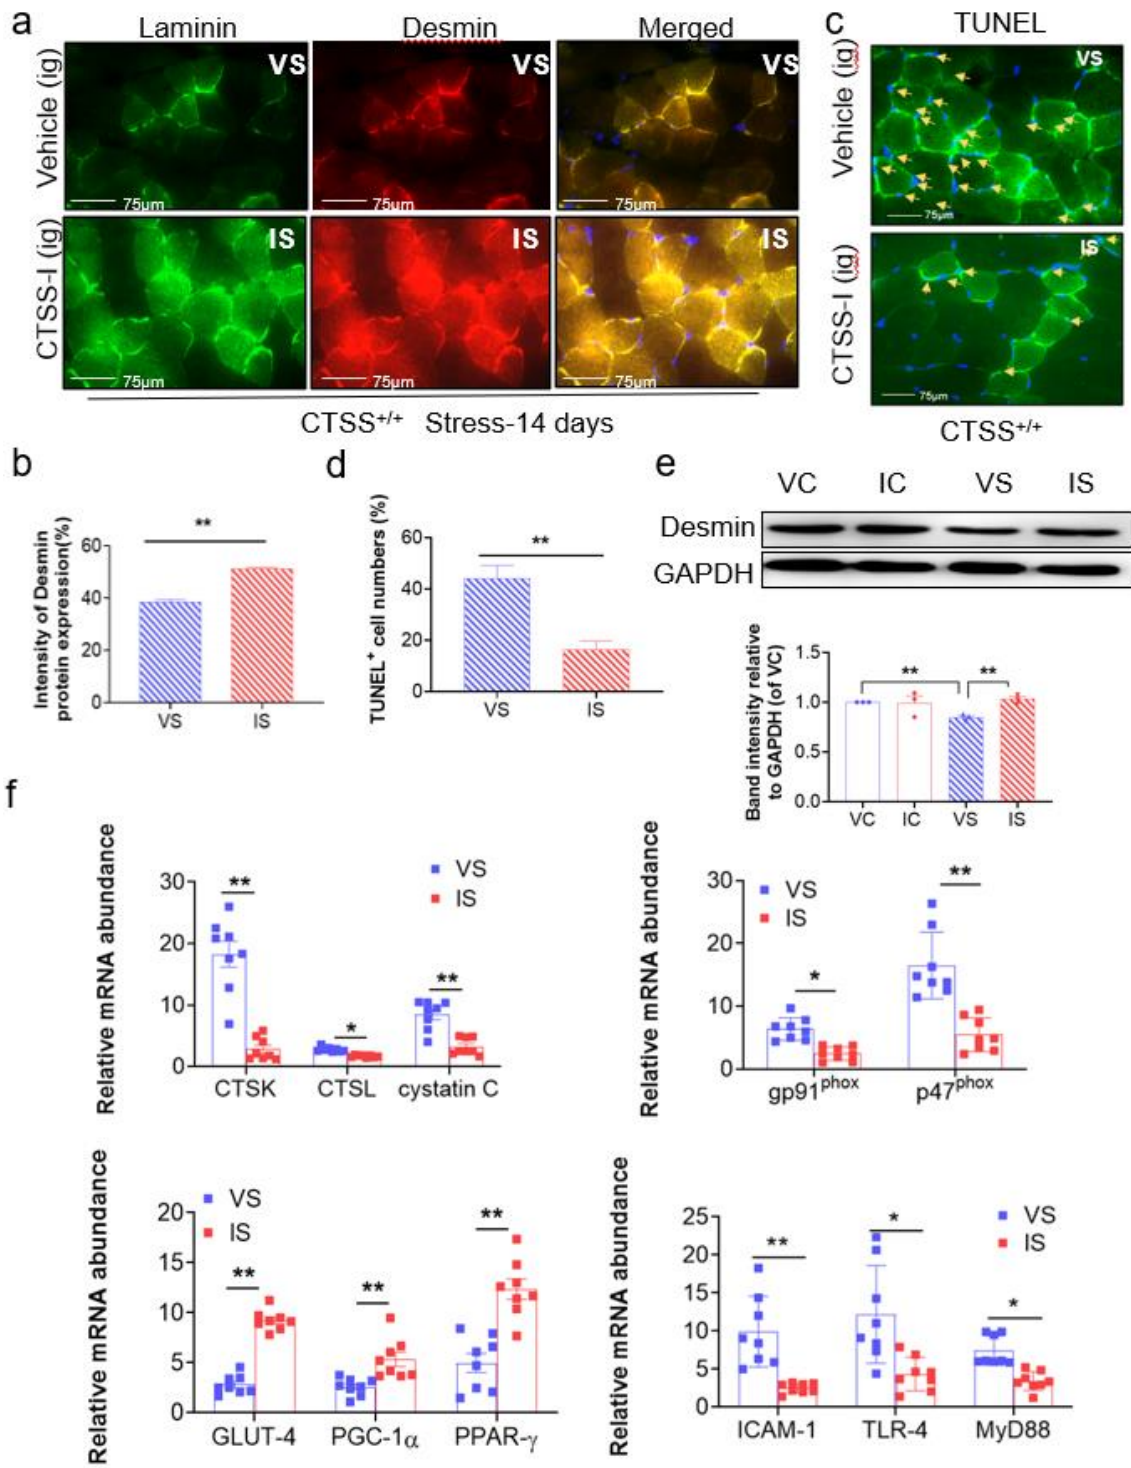

**Fig S4**

**a**

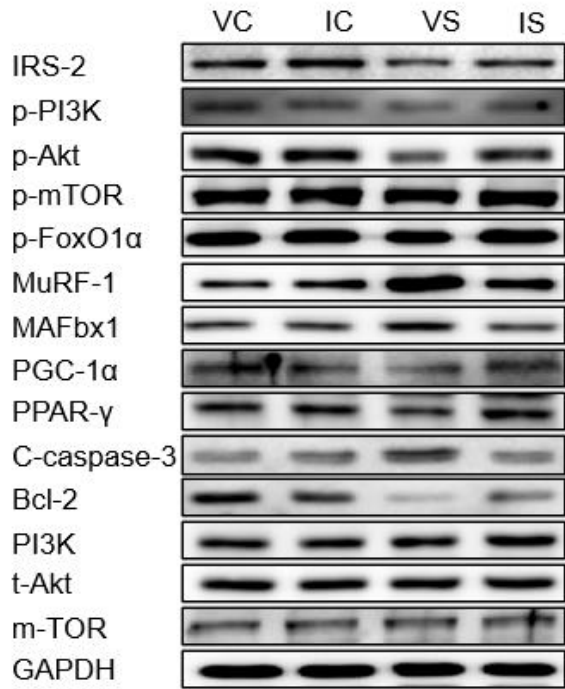

**b**

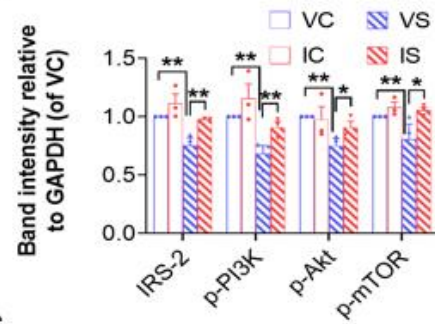

**c**

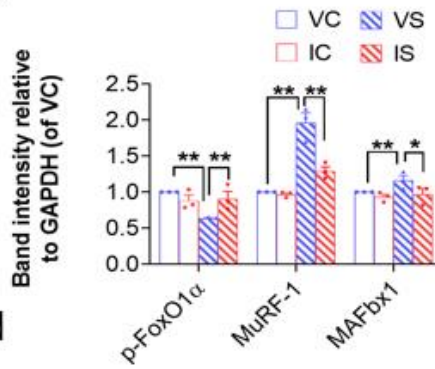

**d**

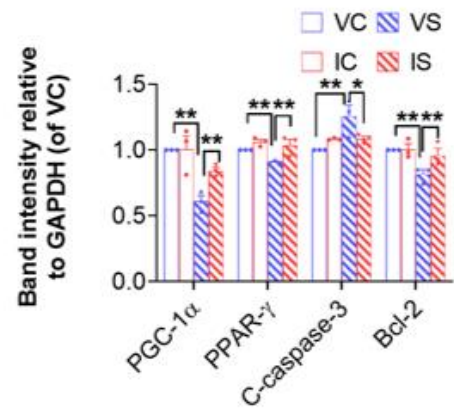

**Fig S5**

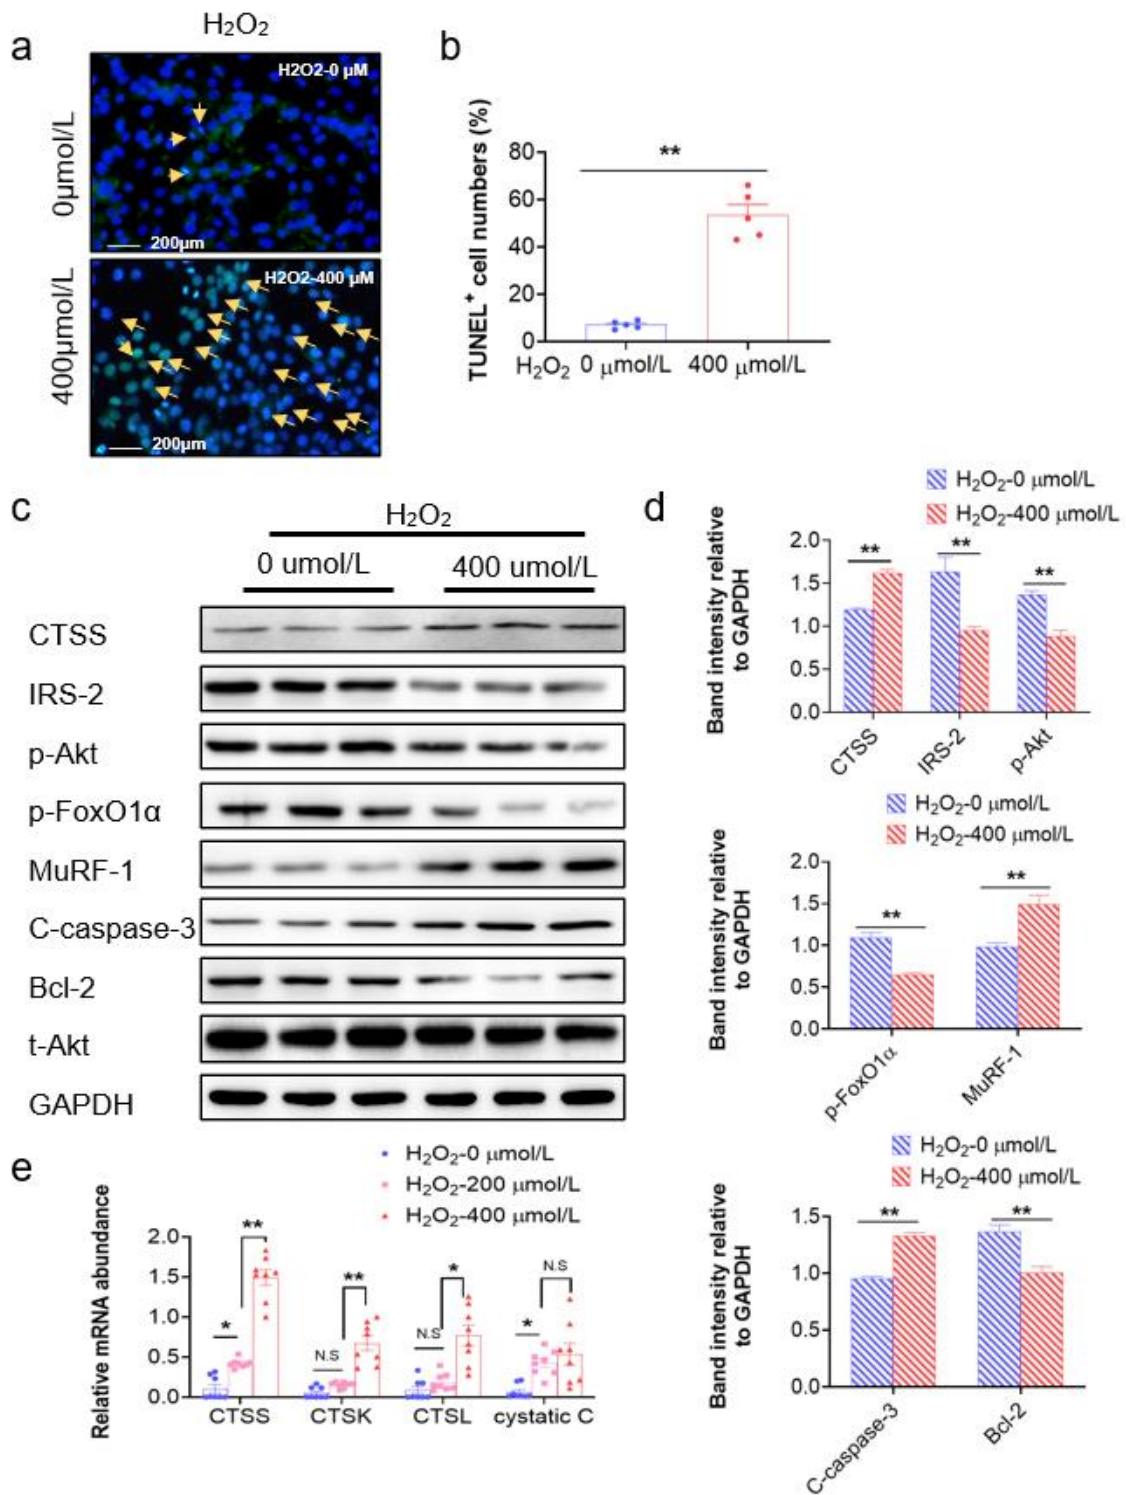

**Fig S6**

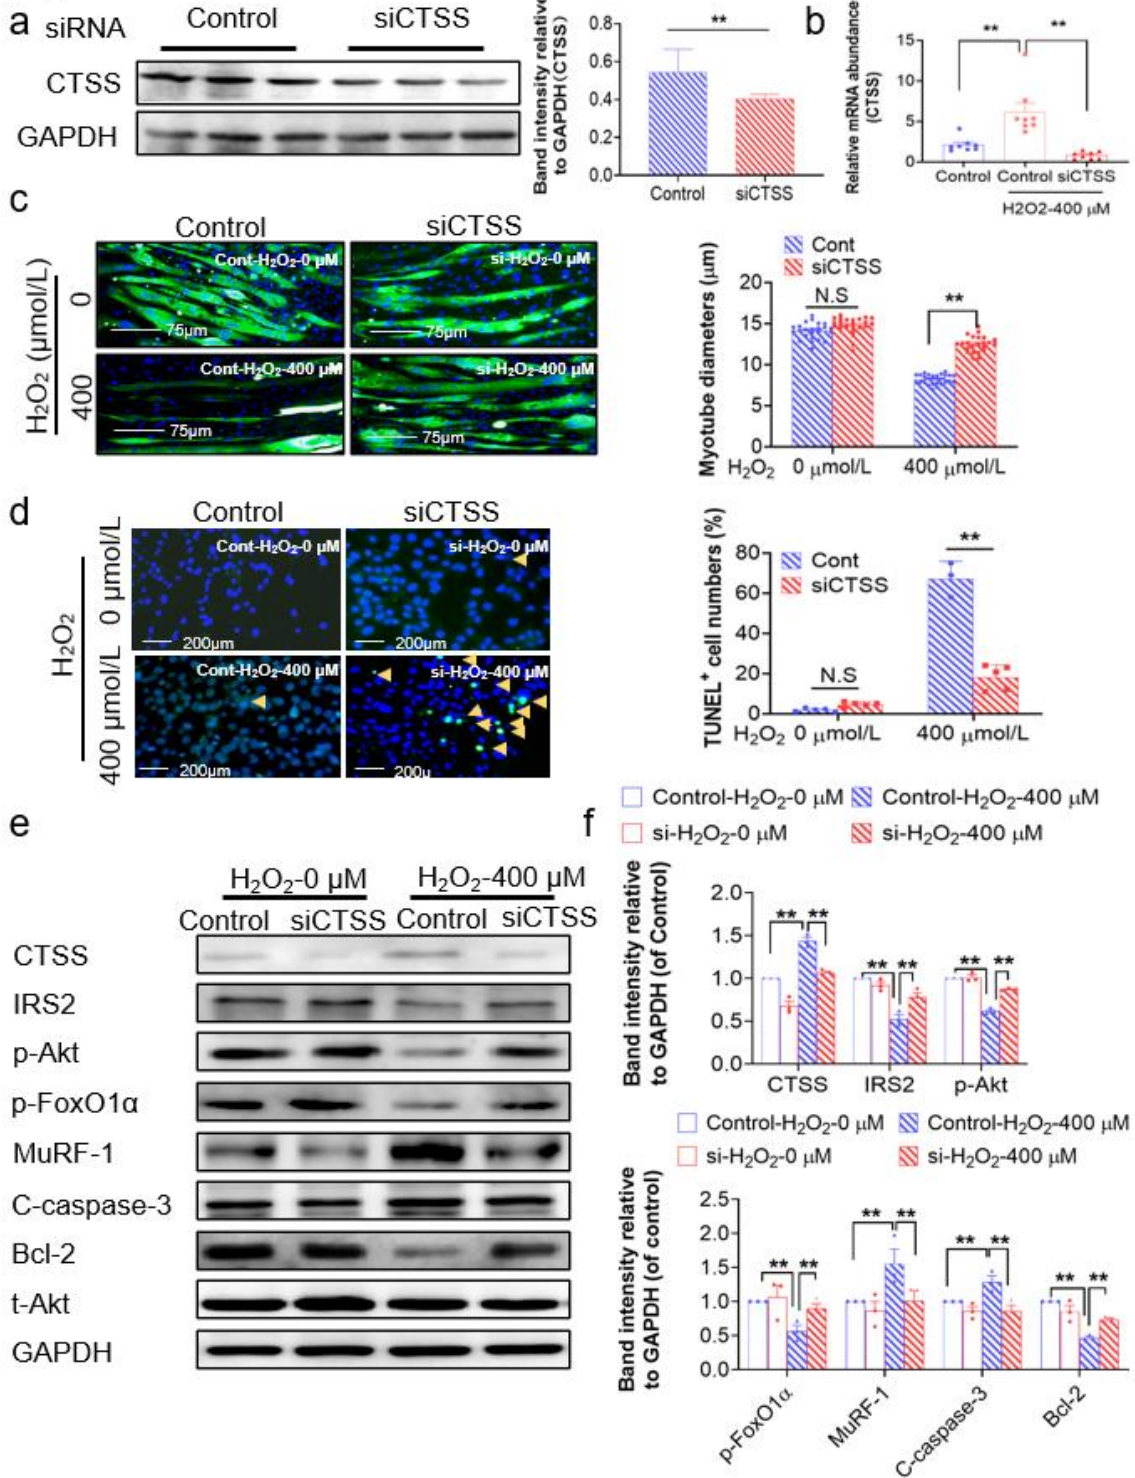

**Fig S7**

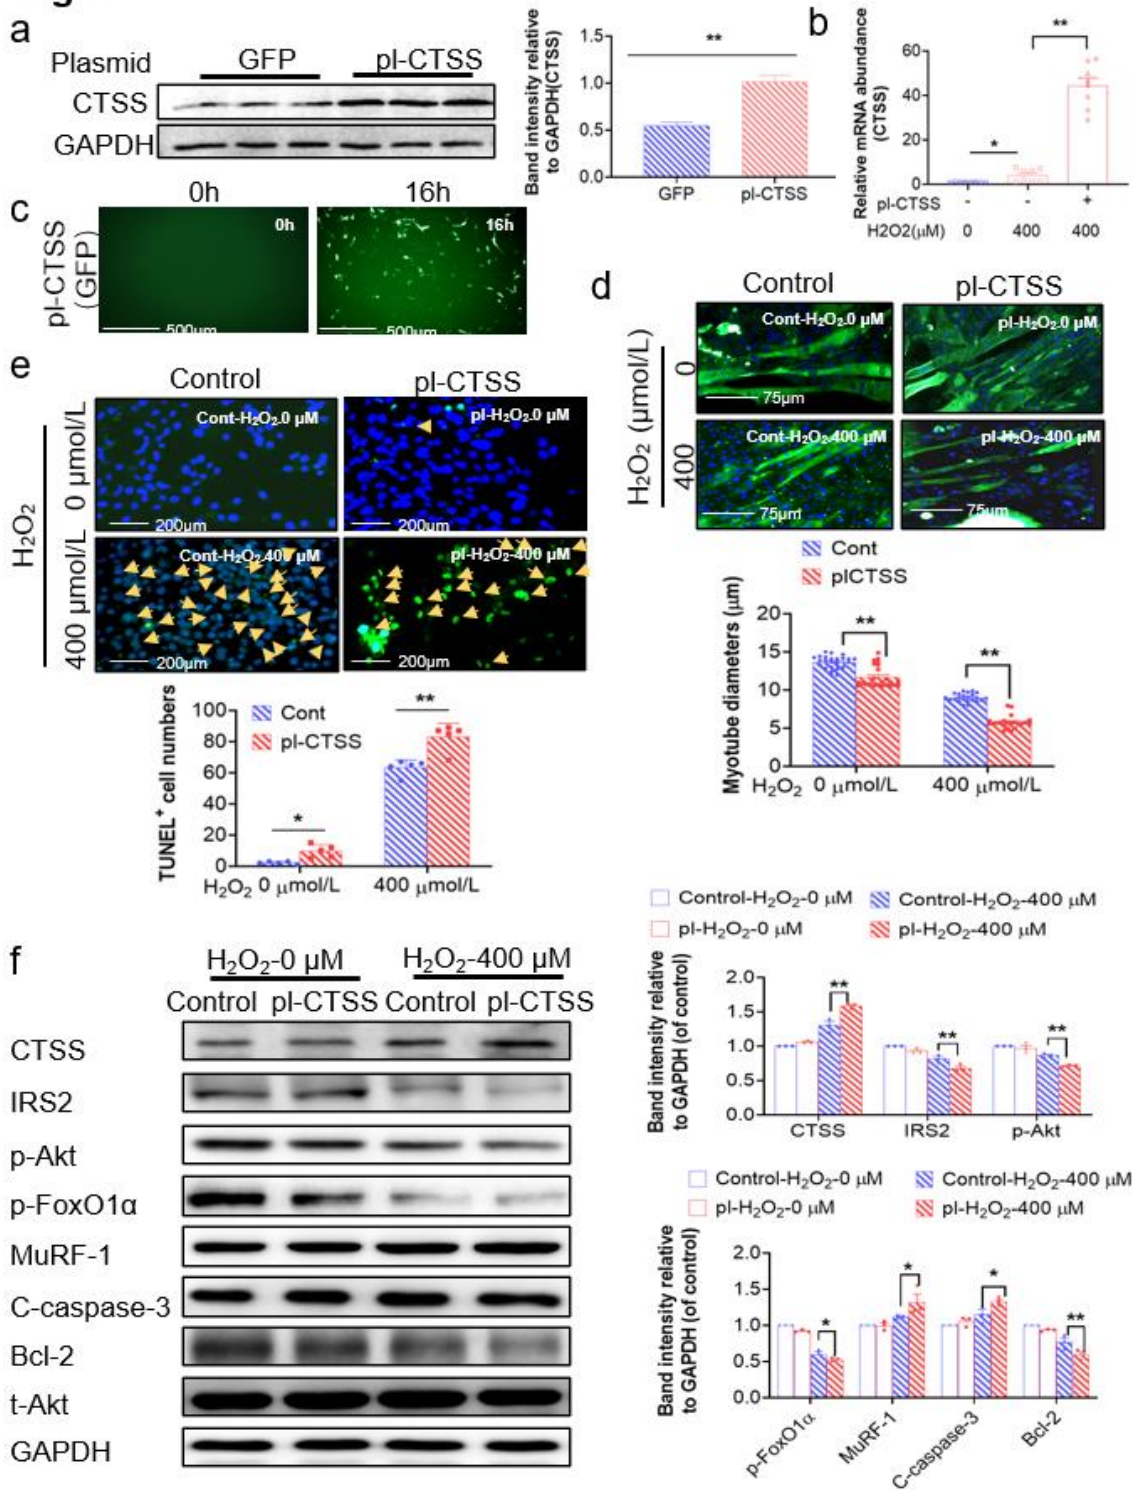

Fig S8

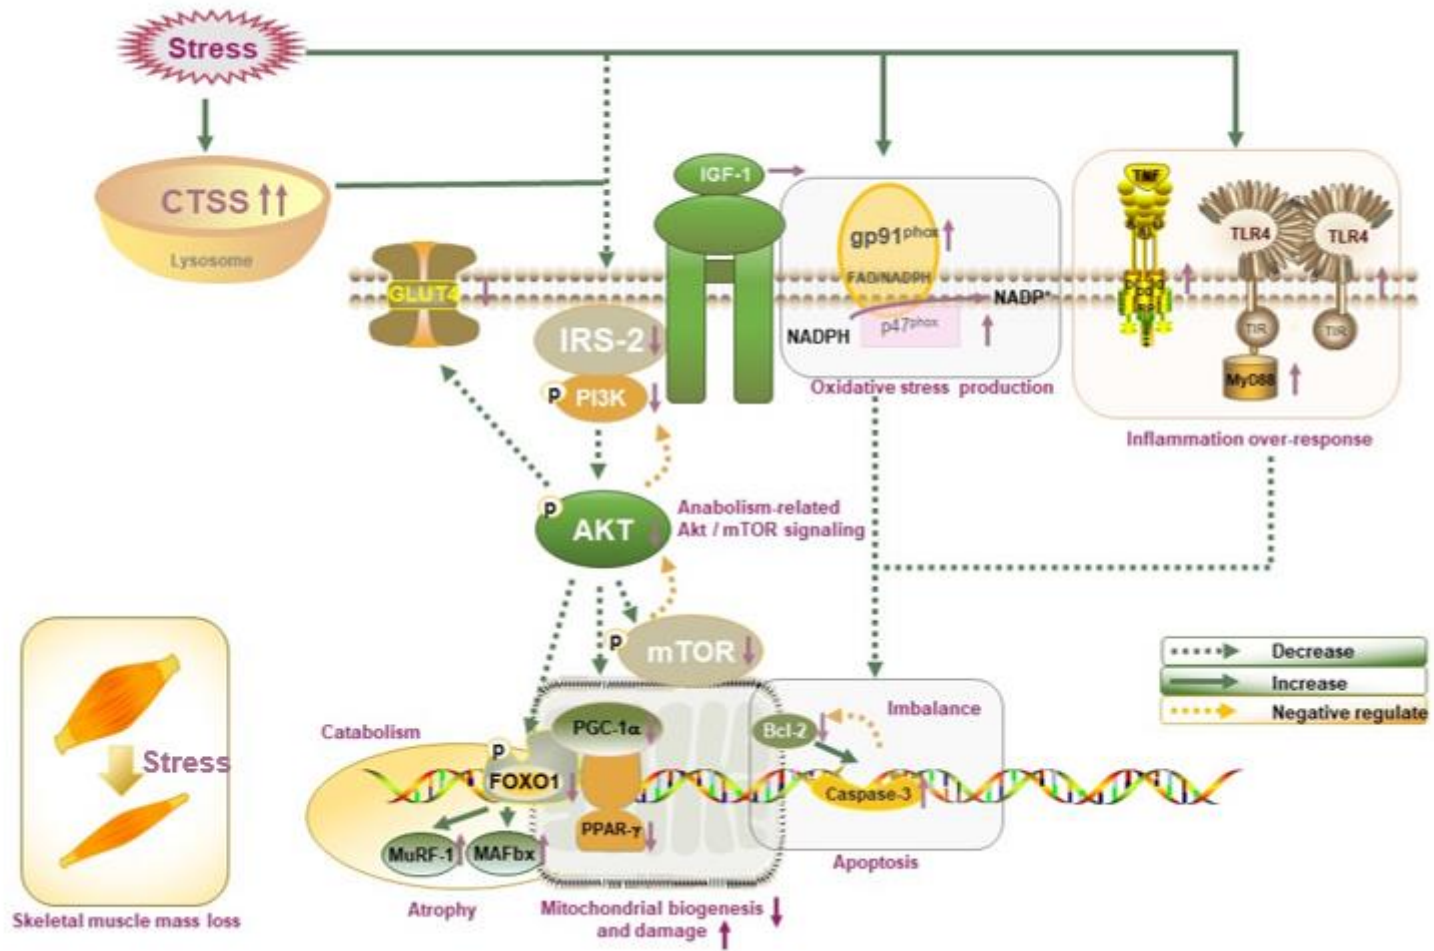

Supplement: 18_2023_4888_MOESM1_ESM.pdf [file 18_2023_4888_MOESM1_ESM.pdf]
